# Supplementary material
Source: PubMed Central journal article supplement (PMC2681332)
Supplement: supp_91587.2008_legend.pdf [file supp_91587.2008_legend.pdf]

## FIGURE LEGENDS

Figure S1 – supplemental material

Representative images of myosin heavy chain I and IIa muscle fibers of an old woman (*upper*) and a young woman (*lower*). The images were captured with a video camera (SONY-DXC-107A) at 400x magnification.
