# Supplementary material
Source: PubMed Central journal article supplement (PMC2681332)

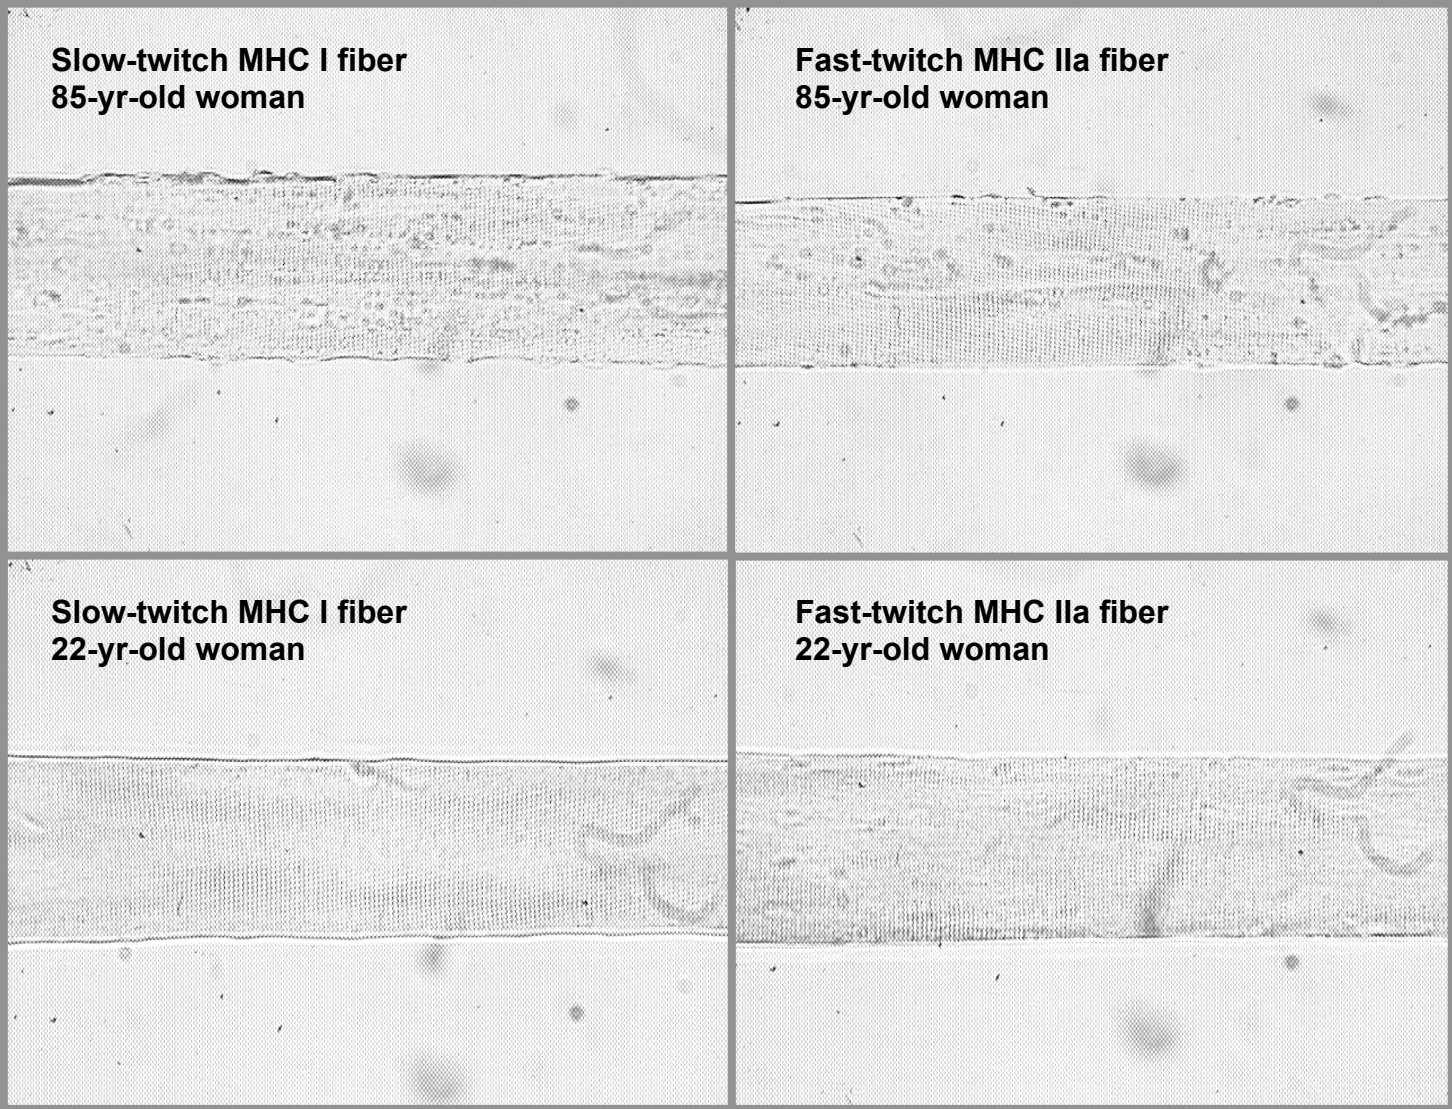

Supplement: supp_91587.2008_suppfig.pdf [file supp_91587.2008_suppfig.pdf]
